# Supplementary material for: Conductive metal adatoms adsorbed on graphene nanoribbons: a first-principles study of electronic structures, magnetization and transport properties
Source: Royal Society of Chemistry journal article supplement (doi:10.1039/c6tc05545a), 2017-01-01
Supplement: c6tc05545a1.pdf [file c6tc05545a1.pdf]

## Conductive Metal Adatom Adsorbed on Graphene Nanoribbons: A First-Principles Study of Electronic Structures, Magnetization and Transport Properties

Cai Xia Wu,<sup>a</sup> Shi Zheng Wen,<sup>b</sup> Li Kai Yan\*,<sup>a</sup> Min Zhang\*,<sup>a</sup> Teng Ying Ma,<sup>a</sup> Yu He Kan,<sup>b</sup> Zhong Min Su\*<sup>a</sup>

**Table S1** Parameters for single adatom adsorbed on 7ZGNR.  $E_{\text{ad}}$  is the adsorption energy,  $\Delta q$  is the charge transfer from metal adatom to 7ZGNR,  $m_{\text{cell}}$  is the magnetic moment,  $h$  is the distance of the adatom above 7ZGNR,  $d_{M-C}$  is the distance between the metal adatom and the nearest carbon atoms,  $\Delta d$  is the maximum deviation in the  $z$  direction of the C atoms in 7ZGNR from the average positions.

|    |   | $h$ (Å) | $d_{M-C}$ (Å) | $\Delta d$ (Å) | $E_{\text{ad}}$ (eV) | $\Delta q$ (e/atom) | $m_{\text{cell}}$ ( $\mu_B$ ) |
|----|---|---------|---------------|----------------|----------------------|---------------------|-------------------------------|
| Al | H | 2.249   | 2.016         | 0.487          | -2.358               | 0.094               | -1.005                        |
| Cu | T | 2.651   | 2.138         | 0.636          | -1.546               | -0.004              | -1.001                        |
| Ag | T | 2.907   | 2.311         | 0.597          | -0.975               | 0.090               | -1.006                        |
| Au | T | 2.958   | 2.377         | 0.584          | -0.930               | 0.203               | -1.012                        |

**Table S2** Parameters for two metal adatoms adsorbed on 6ZGNR.  $E_{\text{ad}}$  is the dimer adsorption energy which treats the two metal adatoms ( $M_2$ ) as a single entity defined as  $E_{\text{ad}} = E_{\text{tot}} - E_{M_2} - E_g$ , and the number in the parenthesis is the binding energy  $E_b$  defined as  $E_b = E_{\text{tot}} - 2E_M - E_g$ , where  $E_M$  stands for the energy of the single adatom.  $d_{M-M}$  is the distance between two metal adatoms.

|    |   | $h$ (Å) | $d_{M-C}$ (Å) | $\Delta d$ (Å) | $d_{M-M}$ (Å) | $E_{\text{ad}}$ ( $E_b$ ) (eV) | $\Delta q$ (e/ $M_2$ ) | $m_{\text{cell}}$ ( $\mu_B$ ) |
|----|---|---------|---------------|----------------|---------------|--------------------------------|------------------------|-------------------------------|
| Al | H | 2.165   | 2.273         | 0.196          | 4.903         | -4.510 (-4.082)                | 0.180                  | -1.583                        |
| Cu | T | 2.650   | 2.109         | 0.558          | 2.437         | -1.073 (-3.096)                | -0.216                 | -1.595                        |
| Ag | T | 2.951   | 2.497         | 0.475          | 2.789         | -0.392 (-1.949)                | -0.056                 | -0.366                        |
| Au | T | 3.500   | 3.428         | 0.122          | 2.806         | -0.167 (-1.787)                | -0.004                 | -0.018                        |

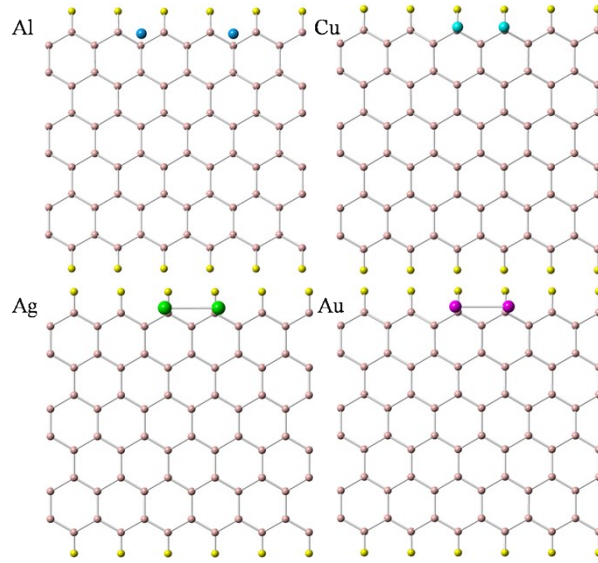

**Fig. S1** The most stable structures for Al, Cu, Ag and Au on 6ZGNR.

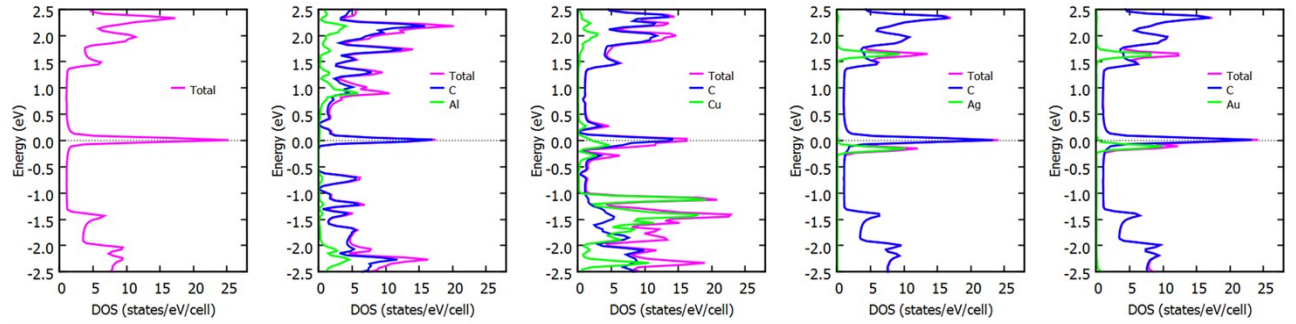

**Fig. S2** PDOS for 6ZGNR-based scattering region.

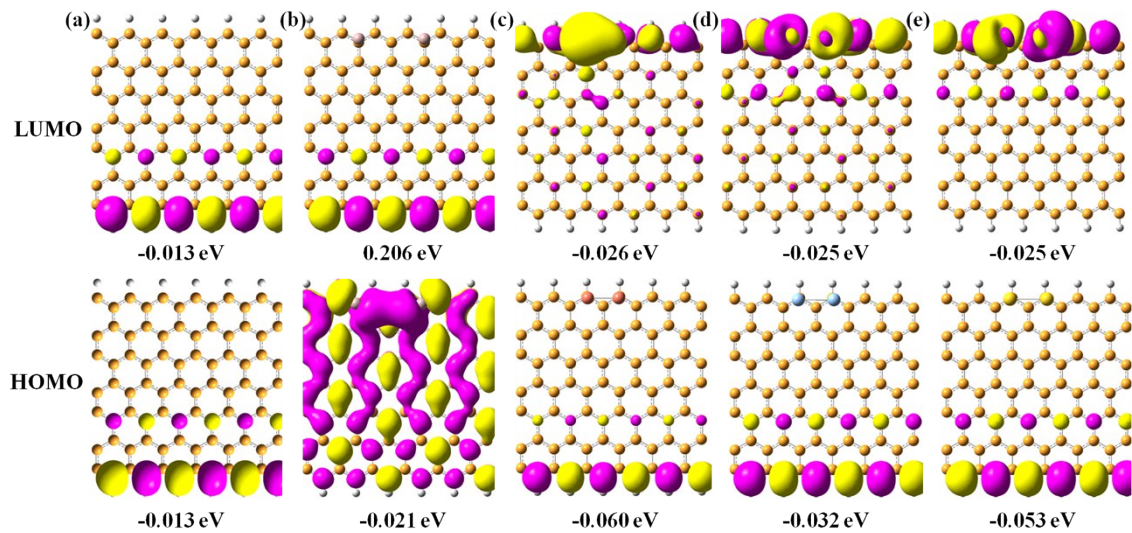

**Fig. S3** Frontier molecular orbitals for pure 7ZGNR (a) and 7ZGNR with Al (b), Cu (c), Ag (d) and Au (e) atom.

## Optimized structures of ZGNR with different metal atoms

### ZGNR-Al:

|   | X         | Y        | Z        |
|---|-----------|----------|----------|
| C | 11.011678 | 0.587792 | 7.291708 |
| C | 8.840828  | 1.820625 | 7.225684 |
| C | 8.148608  | 0.588192 | 7.162406 |
| C | 10.293157 | 1.818544 | 7.286840 |
| C | 15.333388 | 0.587624 | 7.420902 |
| C | 13.172008 | 1.818290 | 7.385096 |
| C | 12.452002 | 0.587427 | 7.345426 |
| C | 14.612137 | 1.818060 | 7.419874 |
| C | 19.644272 | 0.588094 | 7.496825 |
| C | 17.493804 | 1.818220 | 7.466995 |
| C | 16.775659 | 0.587815 | 7.449131 |
| C | 18.947344 | 1.818504 | 7.487258 |
| C | 11.008416 | 3.045576 | 7.380278 |
| C | 8.833965  | 4.273568 | 7.438084 |
| C | 8.144646  | 3.053537 | 7.286266 |
| C | 10.285966 | 4.272744 | 7.463413 |
| C | 15.331622 | 3.047889 | 7.464897 |
| C | 13.168531 | 4.276895 | 7.502672 |
| C | 12.449819 | 3.047233 | 7.418412 |
| C | 14.608970 | 4.277417 | 7.510256 |
| C | 19.643345 | 3.049253 | 7.495978 |
| C | 17.491305 | 4.278631 | 7.504767 |
| C | 16.774335 | 3.047844 | 7.477570 |
| C | 18.945318 | 4.278885 | 7.498918 |
| C | 11.002828 | 5.498353 | 7.582689 |
| C | 8.823541  | 6.714071 | 7.733251 |
| C | 8.135616  | 5.506442 | 7.590191 |
| C | 10.278781 | 6.723127 | 7.697857 |
| C | 15.327624 | 5.507918 | 7.559148 |
| C | 13.163371 | 6.735814 | 7.642999 |
| C | 12.445948 | 5.504380 | 7.581097 |
| C | 14.604873 | 6.736943 | 7.612811 |
| C | 19.641072 | 5.509542 | 7.496389 |
| C | 17.489061 | 6.738090 | 7.550368 |
| C | 16.770906 | 5.508019 | 7.539621 |
| C | 18.943052 | 6.738546 | 7.515931 |
| C | 10.997237 | 7.966765 | 7.739091 |
| C | 8.822306  | 9.219504 | 7.728112 |
| C | 8.152948  | 7.967309 | 8.060561 |

|   |           |           |          |
|---|-----------|-----------|----------|
| C | 10.278610 | 9.211316  | 7.698397 |
| C | 15.326274 | 7.967640  | 7.613137 |
| C | 13.162945 | 9.199066  | 7.643080 |
| C | 12.440887 | 7.967337  | 7.691926 |
| C | 14.604594 | 9.198361  | 7.612516 |
| C | 19.639721 | 7.968198  | 7.498217 |
| C | 17.488962 | 9.197790  | 7.549855 |
| C | 16.769174 | 7.967872  | 7.575821 |
| C | 18.942989 | 9.197810  | 7.515560 |
| C | 11.002384 | 10.437344 | 7.584514 |
| C | 8.833437  | 11.663392 | 7.444246 |
| C | 8.134876  | 10.431232 | 7.598598 |
| C | 10.285744 | 11.662794 | 7.465820 |
| C | 15.327415 | 10.427394 | 7.558465 |
| C | 13.168266 | 11.658085 | 7.502821 |
| C | 12.445516 | 10.430888 | 7.581976 |
| C | 14.608690 | 11.657757 | 7.509622 |
| C | 19.640994 | 10.426833 | 7.495936 |
| C | 17.491164 | 11.657122 | 7.503667 |
| C | 16.770710 | 10.427714 | 7.538725 |
| C | 18.945204 | 11.657364 | 7.498132 |
| C | 11.008274 | 12.889960 | 7.381360 |
| C | 8.840553  | 14.115721 | 7.227381 |
| C | 8.143999  | 12.883109 | 7.290785 |
| C | 10.293011 | 14.116983 | 7.287818 |
| C | 15.331490 | 12.887316 | 7.464046 |
| C | 13.171865 | 14.116788 | 7.384913 |
| C | 12.449646 | 12.887704 | 7.418553 |
| C | 14.612027 | 14.117008 | 7.419465 |
| C | 19.643356 | 12.886960 | 7.495470 |
| C | 17.493820 | 14.117507 | 7.466388 |
| C | 16.774200 | 12.887870 | 7.476523 |
| C | 18.947336 | 14.117645 | 7.486830 |
| H | 7.041975  | 0.588527  | 7.113929 |
| H | 20.751701 | 0.588209  | 7.516020 |
| H | 7.037816  | 3.052881  | 7.254812 |
| H | 20.750525 | 3.051195  | 7.505336 |
| H | 7.028247  | 5.503139  | 7.591810 |
| H | 20.748001 | 5.511445  | 7.478726 |
| H | 7.044161  | 7.968227  | 8.034470 |
| H | 20.746075 | 7.968268  | 7.463470 |
| H | 7.027386  | 10.435055 | 7.598587 |
| H | 20.747917 | 10.425056 | 7.478827 |
| H | 7.037049  | 12.884414 | 7.259820 |

|    |           |           |           |
|----|-----------|-----------|-----------|
| H  | 20.750442 | 12.885334 | 7.505404  |
| Al | 9.028026  | 8.070313  | 10.068440 |

ZGNR-Cu:

|   | X         | Y        | Z        |
|---|-----------|----------|----------|
| C | 11.007617 | 0.610969 | 7.264574 |
| C | 8.835837  | 1.845619 | 7.212193 |
| C | 8.143214  | 0.610790 | 7.147194 |
| C | 10.289188 | 1.843695 | 7.268457 |
| C | 15.331035 | 0.611051 | 7.392468 |
| C | 13.169047 | 1.842479 | 7.356290 |
| C | 12.448747 | 0.611050 | 7.314420 |
| C | 14.609898 | 1.841921 | 7.391118 |
| C | 19.642860 | 0.610646 | 7.494492 |
| C | 17.491795 | 1.841215 | 7.452705 |
| C | 16.773185 | 0.610925 | 7.428902 |
| C | 18.945825 | 1.840670 | 7.481933 |
| C | 11.005997 | 3.071565 | 7.370836 |
| C | 8.836766  | 4.302359 | 7.445738 |
| C | 8.143909  | 3.083992 | 7.280164 |
| C | 10.287119 | 4.300295 | 7.475034 |
| C | 15.329898 | 3.071559 | 7.444384 |
| C | 13.167213 | 4.301448 | 7.492141 |
| C | 12.447934 | 3.071895 | 7.401272 |
| C | 14.607880 | 4.301366 | 7.495629 |
| C | 19.642453 | 3.070771 | 7.496457 |
| C | 17.490942 | 4.301249 | 7.497401 |
| C | 16.772773 | 3.071155 | 7.462782 |
| C | 18.944913 | 4.300953 | 7.497595 |
| C | 11.002749 | 5.527621 | 7.609494 |
| C | 8.834471  | 6.733668 | 7.839008 |
| C | 8.145090  | 5.538440 | 7.630266 |
| C | 10.284057 | 6.751285 | 7.759985 |
| C | 15.328177 | 5.531139 | 7.548590 |
| C | 13.165478 | 6.759775 | 7.646921 |
| C | 12.446228 | 5.529709 | 7.587055 |
| C | 14.606868 | 6.760775 | 7.605821 |
| C | 19.642031 | 5.530894 | 7.500172 |
| C | 17.490439 | 6.760489 | 7.545631 |
| C | 16.771417 | 5.530989 | 7.531826 |
| C | 18.944632 | 6.760536 | 7.517082 |
| C | 11.001909 | 7.991090 | 7.779525 |

|   |           |           |          |
|---|-----------|-----------|----------|
| C | 8.834188  | 9.248333  | 7.833418 |
| C | 8.127596  | 7.991591  | 8.152179 |
| C | 10.283949 | 9.230755  | 7.755800 |
| C | 15.329345 | 7.991030  | 7.604447 |
| C | 13.165495 | 9.222394  | 7.644324 |
| C | 12.441613 | 7.991152  | 7.703847 |
| C | 14.606919 | 9.221473  | 7.603806 |
| C | 19.641790 | 7.990528  | 7.503913 |
| C | 17.490486 | 9.221182  | 7.544667 |
| C | 16.771379 | 7.990975  | 7.568898 |
| C | 18.944673 | 9.220644  | 7.516681 |
| C | 11.002724 | 10.454155 | 7.602794 |
| C | 8.836874  | 11.678628 | 7.433823 |
| C | 8.144975  | 10.442670 | 7.618962 |
| C | 10.287113 | 11.681185 | 7.465867 |
| C | 15.328239 | 10.450907 | 7.545541 |
| C | 13.167247 | 11.680571 | 7.486647 |
| C | 12.446246 | 10.452393 | 7.581828 |
| C | 14.607914 | 11.680702 | 7.491488 |
| C | 19.642127 | 10.450196 | 7.499968 |
| C | 17.491059 | 11.680477 | 7.495543 |
| C | 16.771518 | 10.450895 | 7.529738 |
| C | 18.945019 | 11.680230 | 7.496842 |
| C | 11.006051 | 12.910057 | 7.363589 |
| C | 8.835923  | 14.135865 | 7.205931 |
| C | 8.144113  | 12.896973 | 7.268085 |
| C | 10.289226 | 14.138052 | 7.263581 |
| C | 15.329936 | 12.910527 | 7.441327 |
| C | 13.169109 | 14.139661 | 7.353422 |
| C | 12.447984 | 12.910032 | 7.395711 |
| C | 14.609936 | 14.140134 | 7.389046 |
| C | 19.642573 | 12.910382 | 7.496257 |
| C | 17.491861 | 14.140599 | 7.451828 |
| C | 16.772855 | 12.910640 | 7.460773 |
| C | 18.945929 | 14.140579 | 7.481582 |
| H | 7.036376  | 0.610832  | 7.104332 |
| H | 20.749382 | 0.610594  | 7.521754 |
| H | 7.036899  | 3.088864  | 7.244612 |
| H | 20.749839 | 3.070413  | 7.510332 |
| H | 7.037148  | 5.532169  | 7.657235 |
| H | 20.749231 | 5.530856  | 7.485616 |
| H | 7.043101  | 7.990725  | 7.903241 |
| H | 20.748727 | 7.990311  | 7.472768 |
| H | 7.036979  | 10.448558 | 7.643816 |

|    |           |           |           |
|----|-----------|-----------|-----------|
| H  | 20.749313 | 10.449787 | 7.486300  |
| H  | 7.037201  | 12.891875 | 7.230315  |
| H  | 20.749913 | 12.910530 | 7.510876  |
| Cu | 8.113242  | 7.995420  | 10.168219 |

ZGNR-Ni:

|   | X         | Y        | Z        |
|---|-----------|----------|----------|
| C | 11.016389 | 0.619360 | 7.467372 |
| C | 8.844925  | 1.842741 | 7.513150 |
| C | 8.148410  | 0.619941 | 7.475667 |
| C | 10.296072 | 1.846792 | 7.500612 |
| C | 15.338584 | 0.620954 | 7.471983 |
| C | 13.176104 | 1.851191 | 7.476598 |
| C | 12.457240 | 0.620485 | 7.464472 |
| C | 14.616820 | 1.851000 | 7.474944 |
| C | 19.650149 | 0.621306 | 7.504713 |
| C | 17.498731 | 1.851516 | 7.487997 |
| C | 16.780693 | 0.621057 | 7.480668 |
| C | 18.952964 | 1.851384 | 7.499901 |
| C | 11.010577 | 3.077721 | 7.523720 |
| C | 8.833347  | 4.290376 | 7.628071 |
| C | 8.146951  | 3.073916 | 7.580989 |
| C | 10.285832 | 4.303479 | 7.569234 |
| C | 15.336330 | 3.081099 | 7.479697 |
| C | 13.173161 | 4.309550 | 7.503213 |
| C | 12.453209 | 3.080004 | 7.498806 |
| C | 14.613619 | 4.310495 | 7.487077 |
| C | 19.648895 | 3.081963 | 7.504390 |
| C | 17.496987 | 4.311234 | 7.480806 |
| C | 16.779004 | 3.081175 | 7.482085 |
| C | 18.951014 | 4.311441 | 7.493006 |
| C | 11.007833 | 5.535858 | 7.541780 |
| C | 8.840536  | 6.771448 | 7.552452 |
| C | 8.105651  | 5.533274 | 7.699099 |
| C | 10.294402 | 6.771224 | 7.541238 |
| C | 15.333721 | 5.540951 | 7.483191 |
| C | 13.169725 | 6.771054 | 7.506827 |
| C | 12.449244 | 5.538944 | 7.517900 |
| C | 14.611112 | 6.770868 | 7.490417 |
| C | 19.647629 | 5.541375 | 7.499921 |
| C | 17.496095 | 6.771000 | 7.476549 |
| C | 16.776948 | 5.541024 | 7.476477 |

|   |           |           |          |
|---|-----------|-----------|----------|
| C | 18.950553 | 6.771126  | 7.488949 |
| C | 11.007835 | 8.006509  | 7.540625 |
| C | 8.833184  | 9.252649  | 7.625677 |
| C | 8.105494  | 8.009727  | 7.697327 |
| C | 10.285687 | 9.238860  | 7.567182 |
| C | 15.333796 | 8.000771  | 7.483087 |
| C | 13.173069 | 9.232374  | 7.502282 |
| C | 12.449111 | 8.002930  | 7.517133 |
| C | 14.613671 | 9.231151  | 7.486651 |
| C | 19.647723 | 8.000935  | 7.499853 |
| C | 17.496906 | 9.230543  | 7.480608 |
| C | 16.776834 | 8.000737  | 7.476403 |
| C | 18.951163 | 9.230742  | 7.492886 |
| C | 11.010511 | 10.464618 | 7.521853 |
| C | 8.844966  | 11.700321 | 7.511160 |
| C | 8.146798  | 10.469200 | 7.578308 |
| C | 10.296013 | 11.695731 | 7.499028 |
| C | 15.336289 | 10.460626 | 7.479185 |
| C | 13.176123 | 11.690762 | 7.475849 |
| C | 12.453158 | 10.462051 | 7.497526 |
| C | 14.616766 | 11.690925 | 7.474349 |
| C | 19.648974 | 10.460396 | 7.504389 |
| C | 17.498814 | 11.690209 | 7.487823 |
| C | 16.779101 | 10.460606 | 7.481756 |
| C | 18.952956 | 11.690801 | 7.499962 |
| C | 11.016400 | 12.923079 | 7.466760 |
| C | 8.844976  | 14.151567 | 7.460402 |
| C | 8.148434  | 12.923268 | 7.474578 |
| C | 10.297811 | 14.151346 | 7.458883 |
| C | 15.338477 | 12.920766 | 7.471609 |
| C | 13.178121 | 14.150973 | 7.459675 |
| C | 12.457210 | 12.921697 | 7.464107 |
| C | 14.618441 | 14.151029 | 7.466365 |
| C | 19.650098 | 12.920932 | 7.504766 |
| C | 17.499283 | 14.150894 | 7.484890 |
| C | 16.780738 | 12.920818 | 7.480429 |
| C | 18.953197 | 14.151155 | 7.497002 |
| H | 7.041250  | 0.621255  | 7.479992 |
| H | 20.757597 | 0.621886  | 7.513897 |
| H | 7.039818  | 3.070410  | 7.604179 |
| H | 20.755966 | 3.082737  | 7.514724 |
| H | 7.032662  | 5.511286  | 7.412721 |
| H | 20.754741 | 5.541980  | 7.519723 |
| H | 7.032890  | 8.031163  | 7.409347 |



|    |           |           |          |
|----|-----------|-----------|----------|
| H  | 20.754715 | 8.000422  | 7.519728 |
| H  | 7.039728  | 10.472984 | 7.601369 |
| H  | 20.756018 | 10.459739 | 7.514660 |
| H  | 7.041236  | 12.922255 | 7.479146 |
| H  | 20.757642 | 12.920785 | 7.513830 |
| Ni | 8.100464  | 6.772672  | 9.347416 |
